# Supplementary material for: Chemoproteomic target deconvolution reveals Histone Deacetylases as targets of (R)-lipoic acid
Source: PubMed Central journal article supplement (PMC10272112; doi:10.1038/s41467-023-39151-8), 2023-06-15
Supplement: 41467_2023_39151_MOESM1_ESM.pdf [file 41467_2023_39151_MOESM1_ESM.pdf]

# Supplementary Information

## Chemoproteomic target deconvolution reveals Histone Deacetylases as targets of (R)-lipoic acid

Severin Lechner<sup>1</sup>, Raphael R. Steimbach<sup>2,3</sup>, Longlong Wang<sup>4,5</sup>, Marshall L. Deline<sup>6</sup>, Yun-Chien Chang<sup>1</sup>, Tobias Fromme<sup>6,7</sup>, Martin Klingenspor<sup>6,7,8</sup>, Patrick Matthias<sup>4,5</sup>, Aubry K. Miller<sup>2,9</sup>, Guillaume Médard<sup>1</sup>, Bernhard Kuster<sup>1,9,10</sup>

<sup>1</sup>*Chair of Proteomics and Bioanalytics, TUM School of Life Sciences, Technical University of Munich, Freising, Germany.*

<sup>2</sup>*Cancer Drug Development, German Cancer Research Center (DKFZ), Heidelberg, Germany.*

<sup>3</sup>*Biosciences Faculty, Heidelberg University, Heidelberg, Germany.*

<sup>4</sup>*Friedrich Miescher Institute for Biomedical Research, 4058 Basel, Switzerland.*

<sup>5</sup>*Faculty of Sciences, University of Basel, 4031 Basel, Switzerland.*

<sup>6</sup>*Chair of Molecular Nutritional Medicine, TUM School of Life Sciences, Technical University of Munich, Freising, Germany.*

<sup>7</sup>*EKFZ - Else Kröner Fresenius Center for Nutritional Medicine, Technical University of Munich, Freising, Germany*

<sup>8</sup>*ZIEL Institute for Food & Health, Technical University of Munich, Freising, Germany.*

<sup>9</sup>*German Cancer Consortium (DKTK), Heidelberg, Germany.*

<sup>10</sup>*Bavarian Center for Biomolecular Mass Spectrometry (BayBioMS), Technical University of Munich, Freising, Germany.*

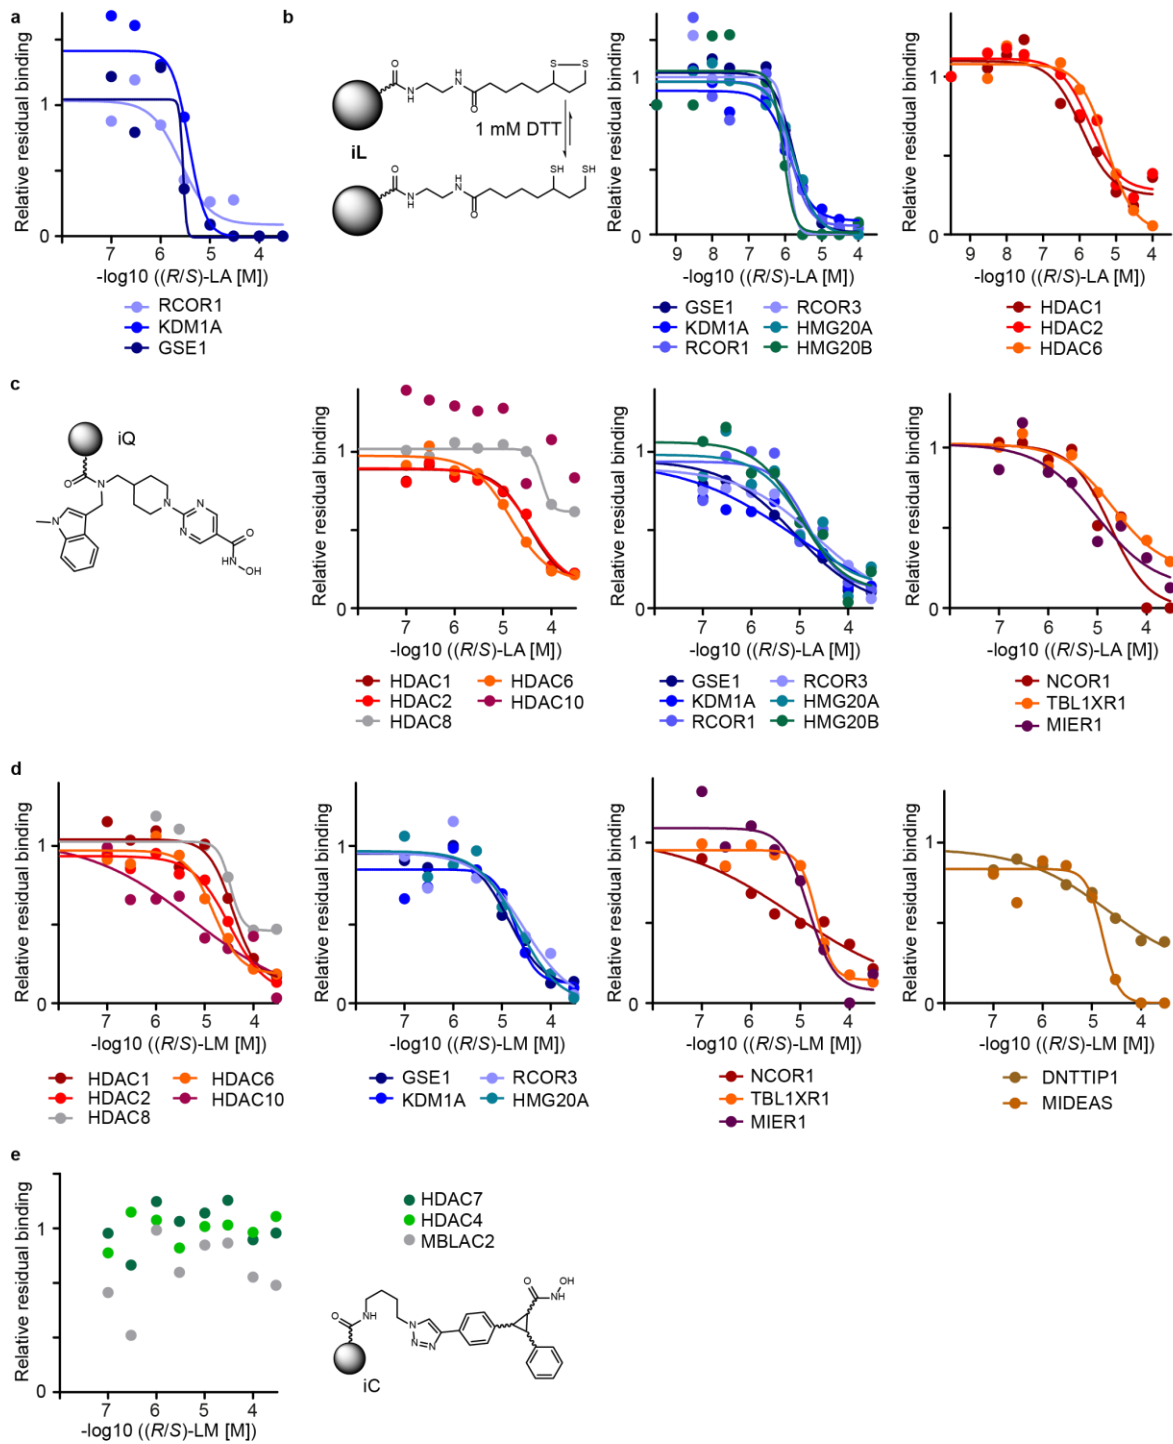

**Supplementary Fig. 1 | Chemoproteomics identifies HDACs as targets of liponic acid and lipoamide.** **a**, Dose-response curves of HDAC CoREST complex partners from the LA-iL competition experiment in SW620 cell lysate. **b**, Dose-response curves of HDACs and CoREST complex partners from the LA-iL competition experiment in A549 cell lysate. **c**, Dose-response curves from the LA-iQ competition assay in SW620 cell lysate. HDAC interactor MIER1 and complex partners of the HDAC3 NCoR complex (NCOR1, TBL1XR1) as well as the HDAC1/2 CoREST complex (RCOR1/3, KDM1A, HMG20A/B, GSE1) show a dose-dependent reduction in affinity matrix binding. **d**, same as (c) but for lipoamide and including additional curves for MiDAC complex partners DNTTIP and MIDEAS. **e**, Competition assay for lipoic acid probing class IIa HDAC and MBLAC2 binding using established affinity matrix iC. Source data are provided as a Source Data file.

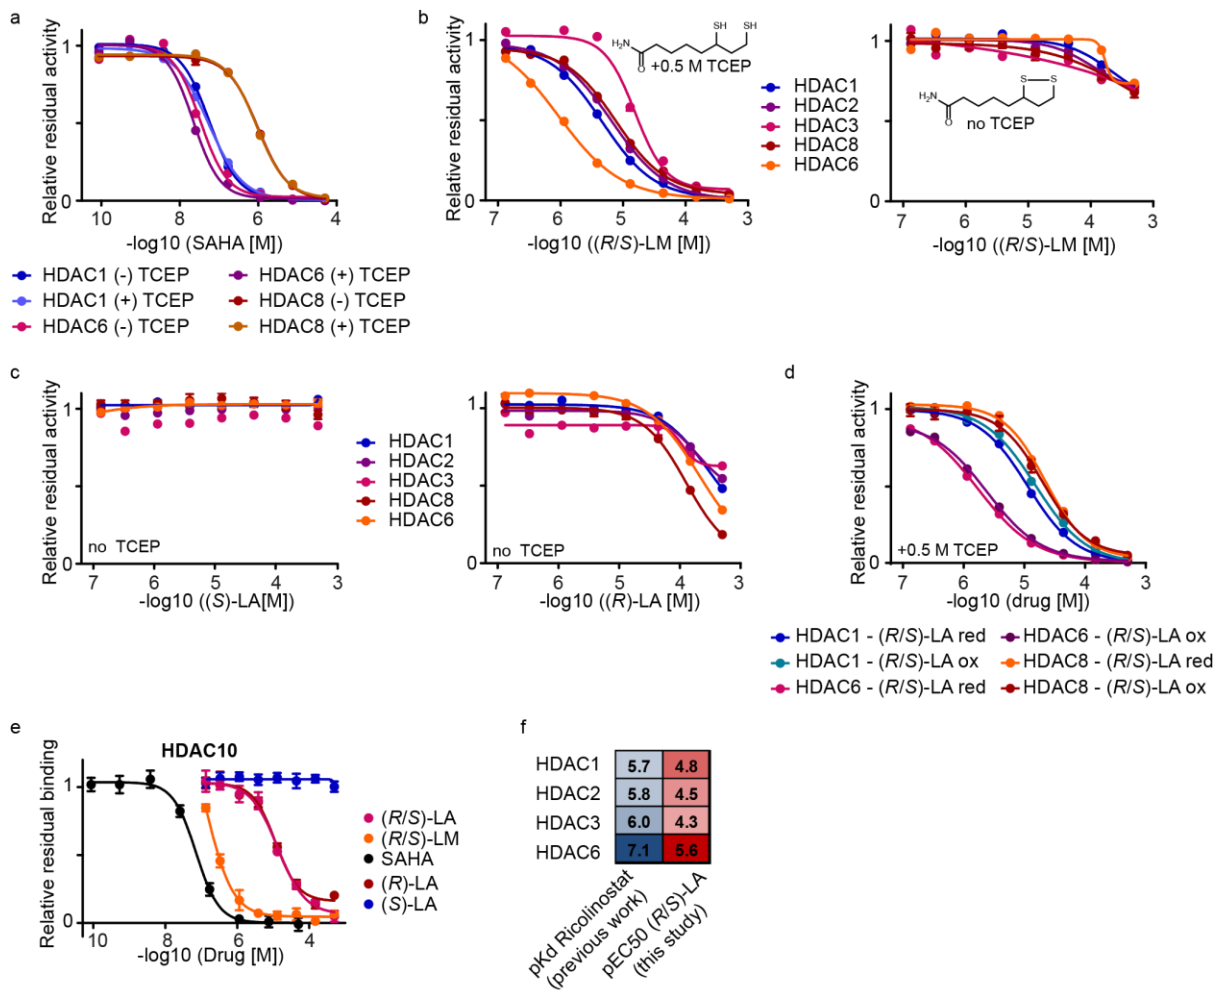

**Supplementary Fig. 2 | HDAC activity assays confirm the inhibitory effects of the reduced forms of (R)-lipoic acid, (R/S)-lipoic acid, and (R/S)-lipoamide.** **a**, HDAC inhibition by SAHA (Vorinostat) in the Glo-assay setup is in the presence (+) or absence (-) of reducing agent TCEP (0.5 M) (n = 3 technical replicates for each drug dose, data are represented as mean value +/- SEM). **b**, influence of reducing agent TCEP (0.5 M) on Lipoamide mediated HDAC enzymatic inhibition via reduction and thiolane ring opening of the drugs (n = 3 technical replicates for each drug dose, data are represented as mean value +/- SEM). **c**, Dose-dependent effect of (S)- and (R)-lipoic acid on HDAC activity under non-reducing conditions (n = 3 technical replicates for each drug dose, data are represented as mean value +/- SEM). **d**, Comparison of effects of racemic reduced LA ((R/S)-LA red, i.e. dihydrolipoic acid) and oxidized (R/S)-LA on HDAC activity in the presence of reducing agent TCEP (0.5 M) (n = 3 technical replicates for each drug dose, data are represented as mean +/- SEM). **e**, FRET-based HDAC10 binding assay under reducing assay conditions (0.5 M TCEP) (n = 3 technical replicates for each drug dose, data are represented as mean value +/- SEM). **f**, lipoic acid pEC<sub>50</sub> values from the Glo-HDAC activity assay are compared to the Ricolinostat pK<sub>d</sub><sup>app</sup>s from ref.<sup>1</sup>. Source data are provided as a Source Data file.

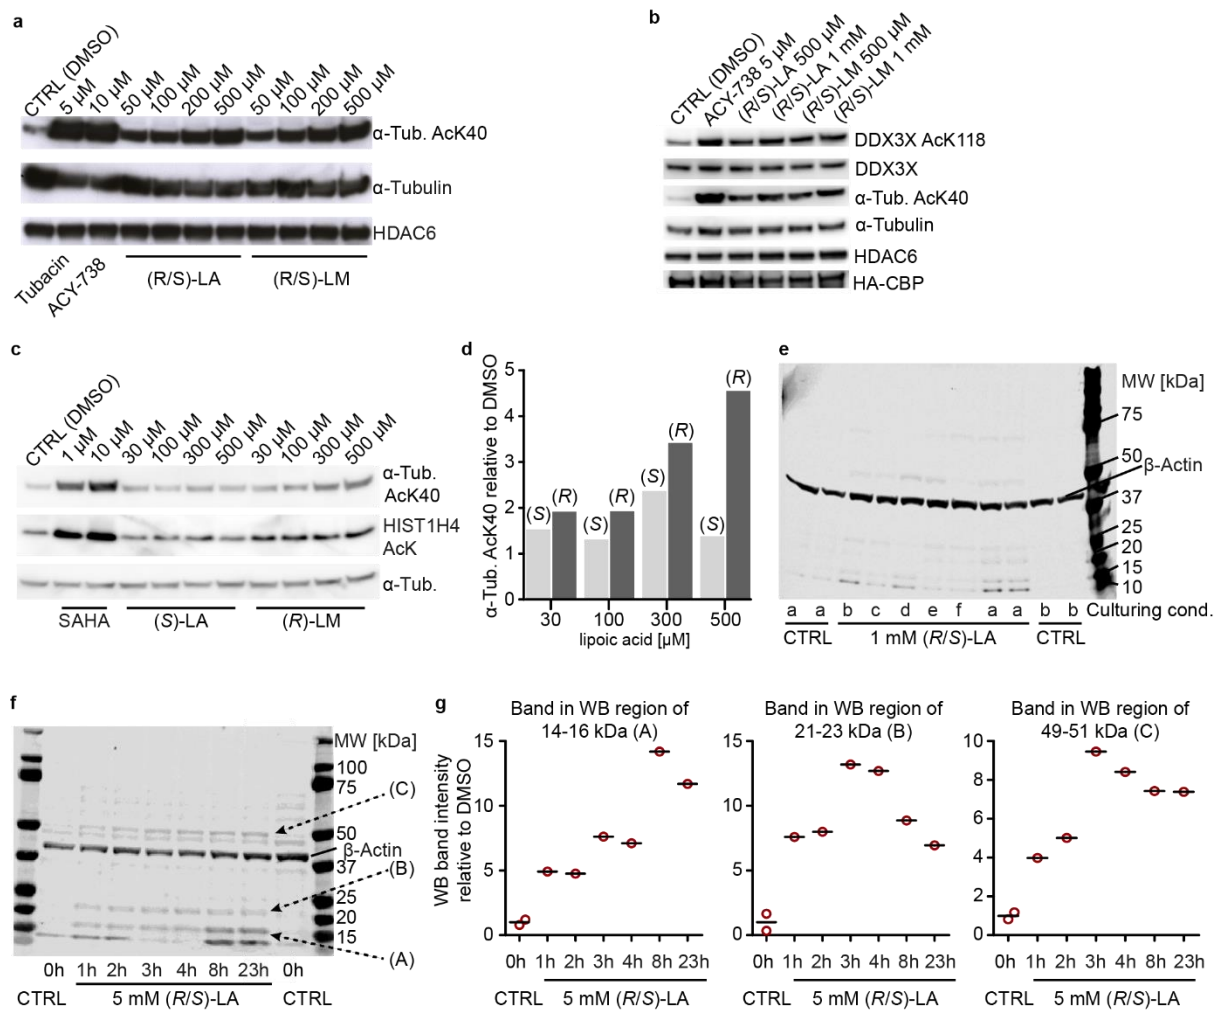

**Supplementary Fig. 3 | Lipoinc acid and lipoinamide treatment leads to hyperacetylation of HDAC substrate proteins. a,** Western blot of CBP-HA (Acetyltransferase) transfected HEK293 cells that were incubated with HDAC6 inhibitor ACY-738, Tubacin, lipoinc acid, or lipoinamide for 7 h at indicated concentrations and probed for HDAC6 substrate protein acetylation site AcK40 of  $\alpha$ -Tubulin as well as  $\alpha$ -Tubulin and HDAC6 expression. **b,** Western blot of CBP-HA transfected HEK293 cells that were incubated with HDAC6 inhibitor ACY-738, lipoinc acid, or lipoinamide for 7 h at indicated concentrations and probed for HDAC6 substrate proteins and acetylation sites (Loading controls: HA-CBP and HDAC6). **c,** Western blot of HEK293T cells treated for 6 h with SAHA (Vorinostat), (R)-lipoinc acid, or (S)-lipoinc acid. **d,** comparison of dose-dependent effect of (R)-LA and (S)-LA treatment on  $\alpha$ -tubulin AcK40 in HEK293 cells (quantification data from Supplementary Fig. 3c). **e,** Acetyl-lysine Western Blot of HeLa S3 cells cultured under various conditions and treated with 1 mM lipoinc acid for 16 h. Culture conditions: a: DMEM (10% FBS), 95% confluency; b: DMEM (10% FBS), 70% confluency; c: IMDM (10% FBS), 70% confluency; d: supernatant of HeLa S3 cells after 3 d of culturing (old DMEM with 10% FBS), e: DMEM (10% FBS) plus 5 mM acetic acid, 70% confluency; f: DMEM (without FBS), 70% confluency. Biological replicates of condition 'a' treated with lipoinc acid or vehicle control (DMSO) were used for quantification and plotting of Fig. 3c. **f** and **g,** Acetyl-lysine Western Blot of HeLa S3 cells treated with 5 mM (R/S)-lipoinc acid for different periods (**f**) and intensity of bands (**g**) relative to control (DMSO, 0 h treatment) after normalization to  $\beta$ -actin loading control (n = 2 biologically independent samples for DMSO control CTRL, data of control is represented as mean value). Source data are provided as a Source Data file.

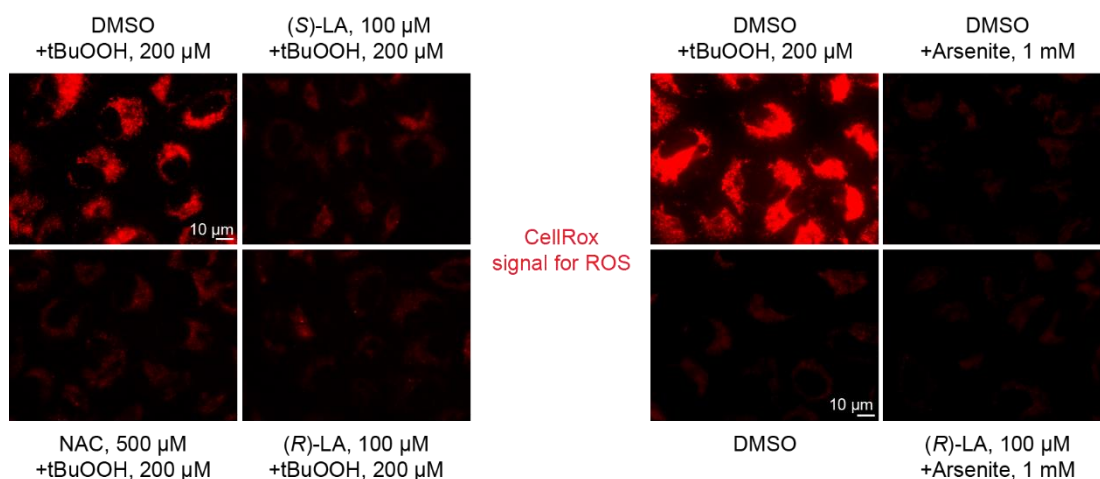

**Supplementary Fig. 4 | Small molecule ROS buffering effect under tertbutylhydroperoxide (tBuOOH) or arsenite stress.** Cells were pretreated with drug molecules and then exposed to stress inducers tBuOOH or arsenite. ROS was quantified by microscopy via CellRox deep red signal intensity.

|                                                                                | (R)-LA | (S)-LA |                                       |
|--------------------------------------------------------------------------------|--------|--------|---------------------------------------|
| Binding to HDACs (chemoproteomics assays)                                      | ✓      | ✗      | effects correlating with HDAC binding |
| Inhibition of HDACs (in vitro enzyme activity assays)                          | ✓      | ✗      |                                       |
| Hyperacetylation of HDAC substrates (western blots)                            | ✓      | ✗      |                                       |
| In cellulo HDAC binding (HDAC6 and HDAC10 nano-BRET)                           | ✓      | ✗      |                                       |
| Preventing arsenite induced stress granule formation (fluorescence microscopy) | ✓      | ✗      | effects independent of HDAC binding   |
| Decreasing tBuOOH-induced oxidative stress (CellRox assay)                     | ✓      | ✓      |                                       |
| Decreasing oxidative stress under arsenite treatment (CellRox assay)           | ✗      | ✗      |                                       |

**Supplementary Fig. 5 | Overview of enantioselective effects of (R)-LA and of effects independent of the stereochemistry of LA.** Assays used for the readout of the effects are provided in brackets.

## Supplementary References

1. Lechner, S. *et al.* Target deconvolution of HDAC pharmacopoeia reveals MBLAC2 as common off-target. *Nat Chem Biol* **18**, 812-820 (2022).
